# Supplementary material for: Anti-adipogenic and Pro-lipolytic Effects on 3T3-L1 Preadipocytes by CX-4945, an Inhibitor of Casein Kinase 2
Source: MDPI journal article supplement (doi:10.3390/ijms23137274), 2022-06-30
Supplement: s1 [file s1]

**Table S1: List of antibodies used for Western blot analysis.**

| <b>Antibodies</b>                  | <b>Dilution used</b> | <b>Source</b>            | <b>Catalog no.</b> |
|------------------------------------|----------------------|--------------------------|--------------------|
| <i><b>Primary antibodies</b></i>   |                      |                          |                    |
| C/EBP- $\alpha$                    | 1:2,000              | Santa Cruz Biotechnology | sc-61              |
| PPAR- $\gamma$                     | 1:2,000              | Santa Cruz Biotechnology | sc-7272            |
| Perilipin A                        | 1:2,000              | BioVision                | #3948-200          |
| FAS                                | 1:2,000              | BD Bioscience            | #9452              |
| p-AMPK (T172)                      | 1:2,000              | Cell signalling          | #2535              |
| AMPK                               | 1:2,000              | Cell signalling          | #2793              |
| p-ACC (S79)                        | 1:2,000              | Cell signalling          | #3661              |
| ACC                                | 1:2,000              | Cell signalling          | #3662              |
| p-LKB-1 (S428)                     | 1:2,000              | Cell signalling          | #3482              |
| LKB-1                              | 1:2,000              | Cell signalling          | #3047              |
| p-HSL (S563)                       | 1:2,000              | Cell signalling          | #4139              |
| p-HSL (S660)                       | 1:2,000              | Cell signalling          | #4126              |
| HSL                                | 1:2,000              | Cayman chemical          | #10006371          |
| p-ERK1/2 (Thr202/Tyr204)           | 1:2,000              | Cell signalling          | #9101              |
| ERK1/2                             | 1:2,000              | Cell signalling          | #4695              |
| p-PKA                              | 1:2,000              | Santa Cruz Biotechnology | sc-377575          |
| PKA                                | 1:2,000              | Santa Cruz Biotechnology | sc-365615          |
| Phospho-CK2 Substrate [(pS/pT)DXE] | 1:2,000              | Santa Cruz Biotechnology | #8738              |
| CK-2 $\alpha$                      | 1:2,000              | Santa Cruz Biotechnology | #2656              |
| S6                                 | 1:5,000              | Cell signalling          | #2217              |
| <i><b>Secondary antibodies</b></i> |                      |                          |                    |
| Goat anti-rabbit IgG-HRP           | 1:5000               | Jackson ImmunoResearch   | 111-035-045        |
| Goat anti-mouse IgG-HRP            | 1:5000               | Jackson ImmunoResearch   | 115-035-062        |

**Table S2: Sequences of primers used for quantitative real-time PC**

| <b>Gene</b>     | <b>Forward</b>          | <b>Reverse</b>           |
|-----------------|-------------------------|--------------------------|
| C/EBP- $\alpha$ | TTACAACAGGCCAGGTTTCC    | CTCTGGGATGGATCGATTGT     |
| PPAR- $\gamma$  | GGTGAAACTCTGGGAGATTC    | CAACCATTGGGTCAGCTCTC     |
| FAS             | TTGCTGGCACTACAGAATGC    | AACAGCCTCAGAGCGACAAT     |
| Perilipin A     | CTTTCTCGACACACCATGGAAAC | CCACGTTATCCGTAACACCCTTCA |
| Leptin          | CCAAAACCCTCATCAAGACC    | CTCAAAGCCACCACCTCTGT     |
| Resistin        | CCGATGAGCAGTCA CCTCCA   | CAGCTGCTTCGCCTCGTCCTCCT  |
| 18S rRNA        | GGTGAAGGTCGGTGTGAACG    | GGTAGGAACACGGAAGGCCA     |
